# Supplementary material for: Evolutionary Dynamics of the Ty3/Gypsy LTR Retrotransposons in the Genome of Anopheles gambiae
Source: PubMed Central journal article supplement (PMC3026039; doi:10.1371/journal.pone.0016328), 2011-01-24
Supplement: pone.0016328.s003.pdf [file pone.0016328.s003.pdf]

| <b>Arm</b> |         | <b>Solo-LTR</b> | <b>Proviral</b> |
|------------|---------|-----------------|-----------------|
| 3R         | Average | 0.034 ± 0.031   | 0.009 ± 0.015   |
|            | N       | 43              | 57              |
| 3L         | Average | 0.034 ± 0.030   | 0.016 ± 0.020   |
|            | N       | 36              | 69              |
| 2R         | Average | 0.032 ± 0.031   | 0.017 ± 0.023   |
|            | N       | 41              | 102             |
| 2L         | Average | 0.038 ± 0.030   | 0.017 ± 0.024   |
|            | N       | 35              | 93              |
| X          | Average | 0.032 ± 0.026   | 0.017 ± 0.027   |
|            | N       | 36              | 63              |
| Total      | Average | 0.034 ± 0.030   | 0.016 ± 0.022   |
|            | N       | 191             | 384             |
