# Supplementary material for: Evolutionary Dynamics of the Ty3/Gypsy LTR Retrotransposons in the Genome of Anopheles gambiae
Source: PubMed Central journal article supplement (PMC3026039; doi:10.1371/journal.pone.0016328), 2011-01-24
Supplement: pone.0016328.s005.pdf [file pone.0016328.s005.pdf]

| Locus    | Lineage<br>(Family) | LTRr location                   | Chromatin<br>type | Condition | % Div | Analysis  | WEST AFRICA |             | EAST AFRICA |             |
|----------|---------------------|---------------------------------|-------------------|-----------|-------|-----------|-------------|-------------|-------------|-------------|
|          |                     |                                 |                   |           |       |           | M           | S           | Asembo      | Jego        |
| Locus 1  | CsRn1<br>(G52_AG)   | 2R: 4043596-<br>4047772 (8A)    | NPE               | Proviral  | 0.0   | Screening | 0.0 (0/5)   | 0.0 (0/5)   | 0.0 (0/5)   | 0.0 (0/5)   |
| Locus 2  | CsRn1<br>(G50_AG)   | 2R: 18580773-<br>18584954 (11A) | NPE               | Proviral  | 0.0   | Screening | 0.0 (0/5)   | 0.0 (0/5)   | 0.0 (0/5)   | 0.0 (0/5)   |
| Locus 3  | CsRn1<br>(G50_AG)   | 2R: 27194388-<br>27194533 (12E) | NPE               | Solo-LTR  | 0.0   | Screening | 0.0 (0/5)   | 0.0 (0/5)   | 0.0 (0/5)   | 0.0 (0/5)   |
| Locus 4  | CsRn1<br>(G51_AG)   | 2R: 30309166-<br>30315068 (13D) | NPE               | Proviral  | 0.6   | Screening | 0.0 (0/5)   | 0.0 (0/5)   | 0.0 (0/5)   | 0.0 (0/5)   |
| Locus 5  | CsRn1<br>(G50_AG)   | 3L: 4901607-<br>4901752 (38C)   | IH                | Proviral  | 5.7   | Screening | 1.0 (5/5)   | 1.0 (5/5)   | 1.0 (5/5)   | 1.0 (5/5)   |
| Locus 6  | Mag                 | 2L: 19195392-<br>19195689 (22F) | NPE               | Solo-LTR  | 7.3   | Screening | 1.0 (5/5)   | 1.0 (5/5)   | 1.0 (5/5)   | 1.0 (5/5)   |
| GQ468823 | (G57_AG)            |                                 |                   |           |       | Extensive | 1.0 (50/50) | 1.0 (48/48) | 1.0 (46/46) | 1.0 (19/19) |
| Locus 7  | Mdg3                | UNK                             | n. d.             | Solo-LTR  | 7.9   | Screening | 1.0 (5/5)   | 1.0 (5/5)   | 1.0 (5/5)   | 1.0 (5/5)   |
| GQ468822 | (8967)              |                                 |                   |           |       | Extensive | 1.0 (50/50) | 1.0 (48/48) | 1.0 (46/46) | 1.0 (19/19) |
| Locus 8  | Mdg3                | 3R: 43554406-<br>43554585 (35C) | NPE               | Solo-LTR  | 8.2   | Screening | 1.0 (5/5)   | 1.0 (5/5)   | 1.0 (5/5)   | 1.0 (5/5)   |
| GQ468821 | (G31_AG)            |                                 |                   |           |       | Extensive | 1.0 (50/50) | 1.0 (48/48) | 1.0 (46/46) | 1.0 (19/19) |
