# Supplementary material for: Evolutionary Dynamics of the Ty3/Gypsy LTR Retrotransposons in the Genome of Anopheles gambiae
Source: PubMed Central journal article supplement (PMC3026039; doi:10.1371/journal.pone.0016328), 2011-01-24
Supplement: pone.0016328.s006.pdf [file pone.0016328.s006.pdf]

| <b>Locus</b>              | <b>Primer (5' to 3')</b>                  | <b>Amplicon</b> | <b>T</b> |
|---------------------------|-------------------------------------------|-----------------|----------|
| <i>Locus 1</i>            | F1 CCC CTC GAG GAT AAG ACA                | 743             | 54       |
|                           | R2 CAT TCA ATC CGG CAG CA                 |                 |          |
| <i>Locus 2</i>            | F1 CAG TGA CGT CCC TAG CA                 | 749             | 53       |
|                           | R2 TTG TTC CGT GAG CTC GA                 |                 |          |
| <i>Locus 3</i>            | F1 CAG TGA CGT CCC TAG CA                 | 711             | 56       |
|                           | R1 GCG ATA CCG TGC GTC A                  |                 |          |
|                           | F1 ATG CTT CCG AAG AGA GGA                |                 |          |
| <i>Locus 4</i>            | R1 TCC GTA CTG CAA GAG GTA                | 604 / 750       | 55       |
|                           | F1 TTG GCC CTC TGG CGT A                  |                 |          |
| <i>Locus 5</i>            | R2 TCG ATG ATG GGG GGG AA                 | 676             | 56       |
|                           | F1 TAT GTT CAC TGC GGC AA                 |                 |          |
| <i>Locus 6 (GQ468823)</i> | R1 TGG AGC TGA ACG TCT GA                 | 256 / 402       | 55       |
|                           | F1 <sup>FAM</sup> TCA CAA CAG CCG AAC GA  |                 |          |
| <i>Locus 7 (GQ468822)</i> | R1 ATG GAC TGC CGC CCT A                  | 600             | 60       |
|                           | F1 <sup>FAM</sup> TCA CAA CAG CCG AAC GA  |                 |          |
|                           | R2 TCC CGA TCG GCA CTC A                  |                 |          |
|                           | F1 <sup>FAM</sup> CGT TTT GCC CAT GCC TA  |                 |          |
| <i>Locus 8 (GQ468821)</i> | R1 TTG ACC ATG CGG CAG A                  | 185             | 59.1     |
|                           | F1 <sup>FAM</sup> CGT TTT GCC CAT GCC TA  |                 |          |
|                           | R2 CGG AAC GGA AAA GAC GA                 |                 |          |
|                           | F1 <sup>FAM</sup> TGG AAT CAC ACT CCA CGA |                 |          |
| <i>Locus 8 (GQ468821)</i> | R1 CGG AAG TTG TGC TAG CAA                | 577             | 56.9     |
|                           | F1 <sup>FAM</sup> CGT TTT GCC CAT GCC TA  |                 |          |
|                           | R2 CGG AAC GGA AAA GAC GA                 |                 |          |
| <i>Locus 8 (GQ468821)</i> | F1 <sup>FAM</sup> TGG AAT CAC ACT CCA CGA | 246             | 60       |
|                           | R1 CGG AAG TTG TGC TAG CAA                |                 |          |
|                           | F1 <sup>FAM</sup> TGG AAT CAC ACT CCA CGA |                 |          |
| <i>Locus 8 (GQ468821)</i> | R2 CGT TCT GTT CGC TGT CA                 | 491             | 60       |
|                           | F1 <sup>FAM</sup> TGG AAT CAC ACT CCA CGA |                 |          |
| <i>Locus 8 (GQ468821)</i> | R2 CGT TCT GTT CGC TGT CA                 | 275             | 60       |
|                           | F1 <sup>FAM</sup> TGG AAT CAC ACT CCA CGA |                 |          |
